# Supplementary material for: Integrated Metabolomic and Transcriptomic Analysis Reveals Differential Flavonoid Accumulation and Its Underlying Mechanism in Fruits of Distinct Canarium album Cultivars
Source: MDPI journal article supplement (doi:10.3390/foods11162527), 2022-08-21
Supplement: s1 [file s1]

**Table S1.** List of qRT-PCR primers used in the study

| Gene_ID            | Primer sequence (5'-3') |                      | Product size/bp | Description                      |
|--------------------|-------------------------|----------------------|-----------------|----------------------------------|
|                    | Upstream                | Downstream           |                 |                                  |
| Cluster-4594.13418 | TGGGCAGGAATCTTGTTG      | TGTCAATCGGTCAGGCTAC  | 90              | Flavonol synthase                |
| Cluster-4594.14937 | GTAGCCTGTGTAGACGCCAA    | TATCCAAGAGAGCCTGAGCC | 162             | Caffeoyl-coa o-methyltransferase |
| Cluster-4594.17781 | GGACATACCCAAAGGAGACC    | TGGAGCAAGAAGAGACCGT  | 165             | P-coumaryl-coa 3'-hydroxylase    |
| Cluster-4594.4477  | ACATCCATAGTTCCAGCGG     | CCAAGGACCCTGAGAATGA  | 124             | Dihydroflavonol 4-reductase      |
| Cluster-4594.10931 | AGGGCTACAGGGATTTGAG     | TCATTATCGGAGCAACTGG  | 104             | Leucoanthocyanidin reductase     |
| Cluster-4594.4206  | GTTTCGTCACTTGTCGGTAA    | GATTTCCAGATTGCCACAC  | 185             | Chalcone isomerase               |
| Cluster-4594.6457  | GAAGCAATCATCCAAGGTG     | GCAGAGAATCGCATACCAC  | 156             | Leucoanthocyanidin reductase     |
| Cluster-4594.12512 | GCAACCTTAGCGTCTCTTTC    | TCAATGGAGTGGGCAATAG  | 160             | Trans-cinnamate 4-monooxygenase  |
| Cluster-4594.11055 | AGCATCGTCAAAGAGCCA      | TCTCAATCCGTGTCTGTGG  | 132             | MYB transcription factor         |
| Cluster-4594.13793 | TCATTCCACATAGCCTCCA     | TTCTGAGTCGGATGCCAA   | 153             | MYB transcription factor         |
| Cluster-4594.12981 | TGCTGGTAAGAATCCTGCC     | TCTCCATAGGGCTTCCACA  | 85              | MYB transcription factor         |
| Cluster-4594.7613  | AAAGCACCATCACCATCAG     | AGGACTGTGGAAATCGCA   | 181             | MYB transcription factor         |
| Cluster-4594.1055  | GCCTGGAAGAACAGACAATG    | TGTGCTTGGATACATCGCT  | 104             | MYB transcription factor         |
| Cluster-4594.1156  | GACAATGGCTAACGGTGAC     | TTTCAACAACCTCTGCGAC  | 197             | MYB transcription factor         |
| Cluster-4594.13463 | ACATTGGCTACCTGAGTGG     | GGCTTATCCTCCATTACACC | 153             | bHLH transcription factor        |
| Cluster-4594.14435 | TTGAGTGTTCTAAGGGCTGA    | GTTCTTCCTCTCCAGTCCAC | 126             | bHLH transcription factor        |
| Cluster-4594.14756 | TTCTTCATCTTCCTCCTCGT    | CCACCCTTATCTTCTTCACC | 120             | bHLH transcription factor        |
| Cluster-4594.17259 | CGTGGAGCAGATGAATAAGTC   | GCCTAACAAGCAACAGTCTC | 139             | bHLH transcription factor        |
