# Supplementary material for: Integrated Metabolomic and Transcriptomic Analysis Reveals Differential Flavonoid Accumulation and Its Underlying Mechanism in Fruits of Distinct Canarium album Cultivars
Source: MDPI journal article supplement (doi:10.3390/foods11162527), 2022-08-21
Supplement: s1 [file s1]

**Table S6.** The gene ID numbers and FPKM values of selected *MYB* and *bHLH* transcription factors

| Gene_ID            | T_C1_FPKM | T_C2_FPKM | T_C3_FPKM | T_H1_FPKM | T_H2_FPKM | T_H3_FPKM | Description               |
|--------------------|-----------|-----------|-----------|-----------|-----------|-----------|---------------------------|
| Cluster-4594.11055 | 29.76     | 38.29     | 30.79     | 17.57     | 17.65     | 14.30     | MYB transcription factor  |
| Cluster-4594.13793 | 9.00      | 10.79     | 10.66     | 37.12     | 32.86     | 29.70     | MYB transcription factor  |
| Cluster-4594.12981 | 8.41      | 11.07     | 10.27     | 3.30      | 4.40      | 4.64      | MYB transcription factor  |
| Cluster-4594.7613  | 5.29      | 5.27      | 5.56      | 2.88      | 1.86      | 2.39      | MYB transcription factor  |
| Cluster-4594.1055  | 0.74      | 0.64      | 1.43      | 0.96      | 4.78      | 4.36      | MYB transcription factor  |
| Cluster-4594.1156  | 1.37      | 1.48      | 0.74      | 7.23      | 8.15      | 7.74      | MYB transcription factor  |
| Cluster-4594.13463 | 18.38     | 22.54     | 18.42     | 9.62      | 10.25     | 10.11     | bHLH transcription factor |
| Cluster-4594.14435 | 9.36      | 11.06     | 8.83      | 2.45      | 2.74      | 2.12      | bHLH transcription factor |
| Cluster-4594.14756 | 28.60     | 38.81     | 32.21     | 13.67     | 10.61     | 9.27      | bHLH transcription factor |
| Cluster-4594.17259 | 13.83     | 14.61     | 11.24     | 4.44      | 5.71      | 4.62      | bHLH transcription factor |
